# Supplementary material for: The Risk Prediction Model for Healthcare-Associated Infections among Elderly Patients Underwent Pancreaticoduodenectomy
Source: Research Square preprint supplement (doi:10.21203/rs.3.rs-138219/v1), 2021-01-15
Supplement: Supplementary file 1 [file 5fedfa586bcd3ecaa7a55dcb.docx]

The Risk Prediction Model for Healthcare-Associated Infections among Elderly Patients Underwent Pancreaticoduodenectomy

**Yuejing Feng , Hongwu Yao, Jie Li, Mingmei Du, Xibao Gao, Yunxi Liu** ，**Chengchao Zhou**

## Additional file

##

## Figure S1 Visualization of real value versus predicted value of HAIs in testing sets

**Table S1** BP-ANN prediction model final weights output results

| **Input layer variables** | **Hidden layer neuron** | | | | | | | | |
| --- | --- | --- | --- | --- | --- | --- | --- | --- | --- |
| 1 | 2 | 3 | 4 | 5 | 6 | 7 | 8 | 9 |
| Weight | 0.186 | -0.412 | -1.822 | -0.933 | -0.900 | -1.228 | -0.571 | -1.442 | -1.625 |
| Fever | -2.381 | 0.697 | -0.635 | -0.132 | -1.126 | 1.472 | -0.275 | -0.155 | 0.037 |
| Continuous fever for more  than three days | 0.611 | 0.786 | -1.625 | -2.472 | 0.000 | -0.860 | -1.470 | -0.672 | -1.951 |
| Ever lived in ICU | 1.287 | 1.391 | 0.810 | -0.753 | -0.796 | -0.565 | 1.120 | 0.491 | -0.179 |
| Blood routine abnormal  percentage | 1.815 | -0.091 | 1.763 | -0.136 | 1.019 | -0.801 | 1.440 | 0.697 | 1.140 |
| Antibacterial combination | 0.544 | 0.486 | 0.161 | 1.665 | 1.745 | -1.627 | 1.741 | -0.988 | 1.572 |
| Postoperative antibacterial  use days | -0.721 | 0.959 | -1.067 | -0.619 | 0.189 | -0.207 | -1.653 | -2.061 | -1.517 |
| Ventilator use | -0.56 | 0.845 | 1.194 | -1.251 | 1.841 | -1.644 | 0.530 | -1.211 | -0.397 |
| Urinary catheter use days | 0.176 | 2.307 | 0.642 | 0.700 | -1.645 | 1.427 | 1.267 | -2.483 | 0.064 |
| **Output layer** | 0.581 | 0.819 | 0.483 | -0.359 | -0.389 | 0.241 | 0.092 | -1.439 | 0.091 |
